## Correction

# Correction: Culprit Vessel Only versus Multivessel Percutaneous Coronary Intervention in Patients Presenting with ST-Segment Elevation Myocardial Infarction and Multivessel Disease

The *PLOS ONE* Staff

The affiliation for all authors is incorrect. The affiliation for all authors should read: Department of Cardiology, Beijing An Zhen Hospital, Capital Medical University, Beijing Institute of Heart, Lung and Blood Vessel Disease, Beijing, China.

## Reference

1. Zhang D, Song X, Lv S, Yuan F, Xu F, et al. (2014) Culprit Vessel Only versus Multivessel Percutaneous Coronary Intervention in Patients Presenting with ST-Segment Elevation Myocardial Infarction and Multivessel Disease. *PLoS ONE* 9(3): e92316. doi:10.1371/journal.pone.0092316

**Citation:** The *PLOS ONE* Staff (2014) Correction: Culprit Vessel Only versus Multivessel Percutaneous Coronary Intervention in Patients Presenting with ST-Segment Elevation Myocardial Infarction and Multivessel Disease. *PLoS ONE* 9(12): e116450. doi:10.1371/journal.pone.0116450

**Published:** December 19, 2014

**Copyright:** © 2014 The *PLOS ONE* Staff. This is an open-access article distributed under the terms of the Creative Commons Attribution License, which permits unrestricted use, distribution, and reproduction in any medium, provided the original author and source are credited.
